# Supplementary material for: Influence of Floodplains and Groundwater Dynamics on the Present-Day Climate simulated by the CNRM Model
Source: Copernicus journal article supplement (doi:10.5194/egusphere-2024-3091), 2024-10-10
Supplement: Supplementary file 1 [file egusphere-2024-3091-supplement.pdf]

# Supporting Information for "Impact of floodplains and groundwater processes on present-day climate simulated by the CNRM climate model"

Bertrand Decharme<sup>1</sup> and Jeanne Colin<sup>1</sup>

<sup>1</sup>Centre National de Recherches Météorologiques (CNRM), Météo-France, CNRS, Université de Toulouse, Toulouse, France

**Correspondence:** Bertrand Decharme (bertrand.decharme@meteo.fr)

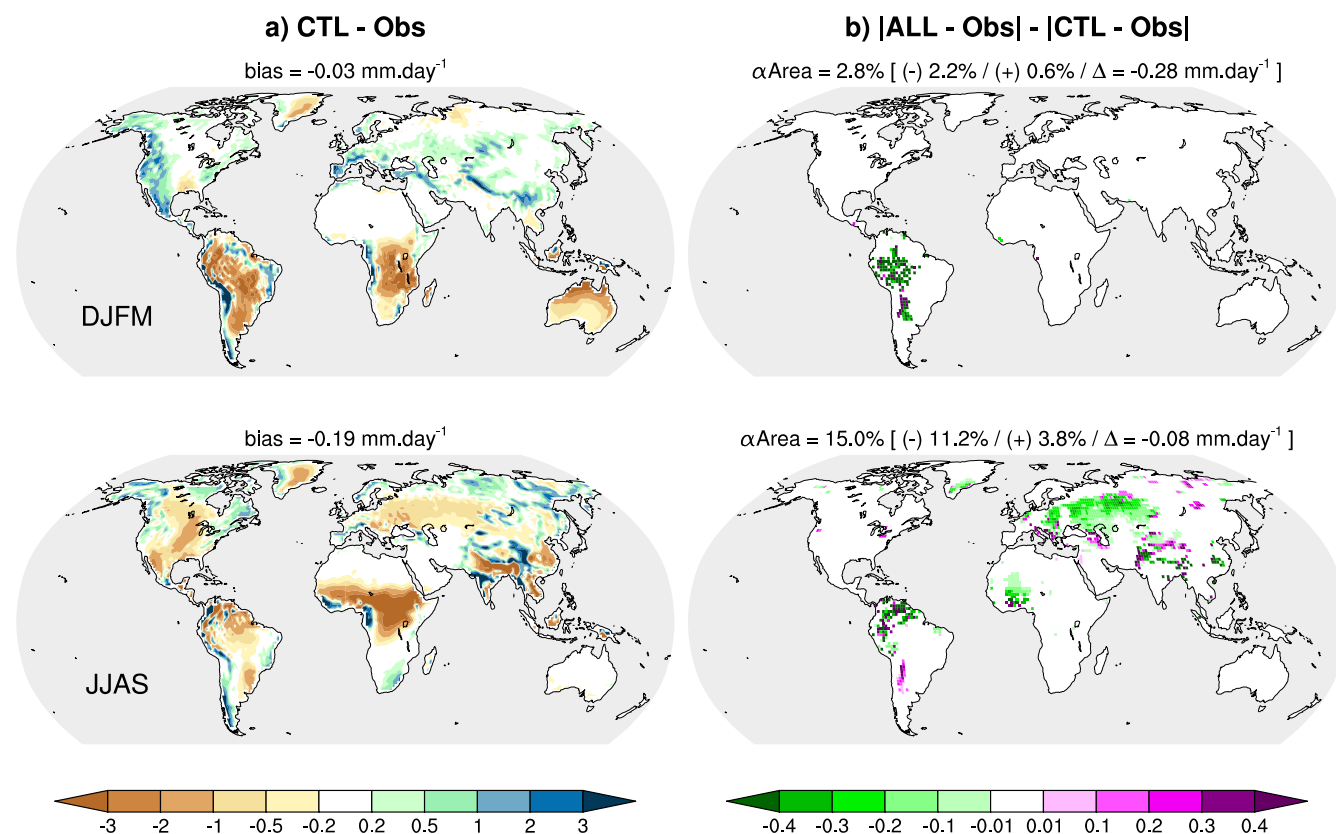

**Figure S1.** Observed vs. simulated precipitation over the 1980–2014 period as in Figure 10a but for extended boreal winter (DJFM) and summer (JJAS) : (a) The CTL ensemble mean bias compared to observations ; and (b) Differences between the CTL and ALL absolute biases over regions with statistically significant difference between CTL and ALL at a 95% level of confidence.

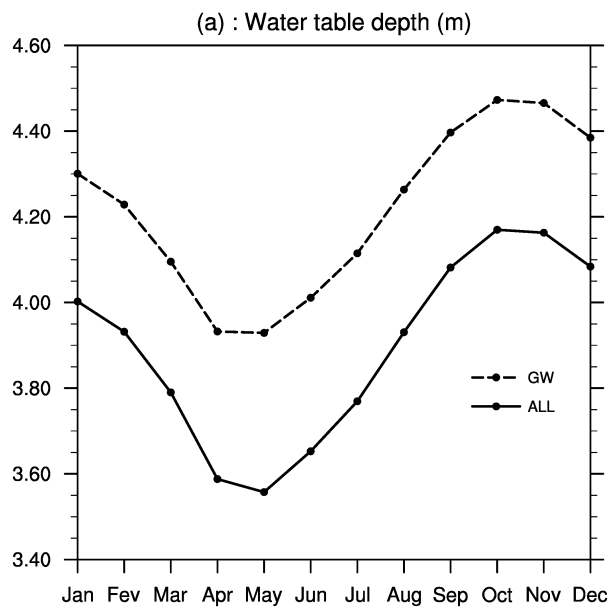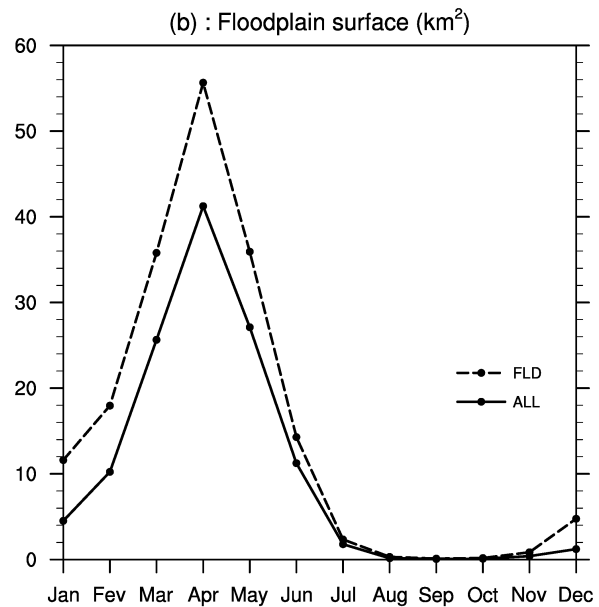

**Figure S2.** (a) : Water table depth ( $m$ ) mean seasonal cycle averaged over the  $[15-60^{\circ}E ; 40-60^{\circ}N]$  box of Figures 7 and 8 for GW and ALL simulations. (b) : Floodplain surface ( $km^2$ ) mean seasonal cycle averaged over the same box, for FLD and ALL.)

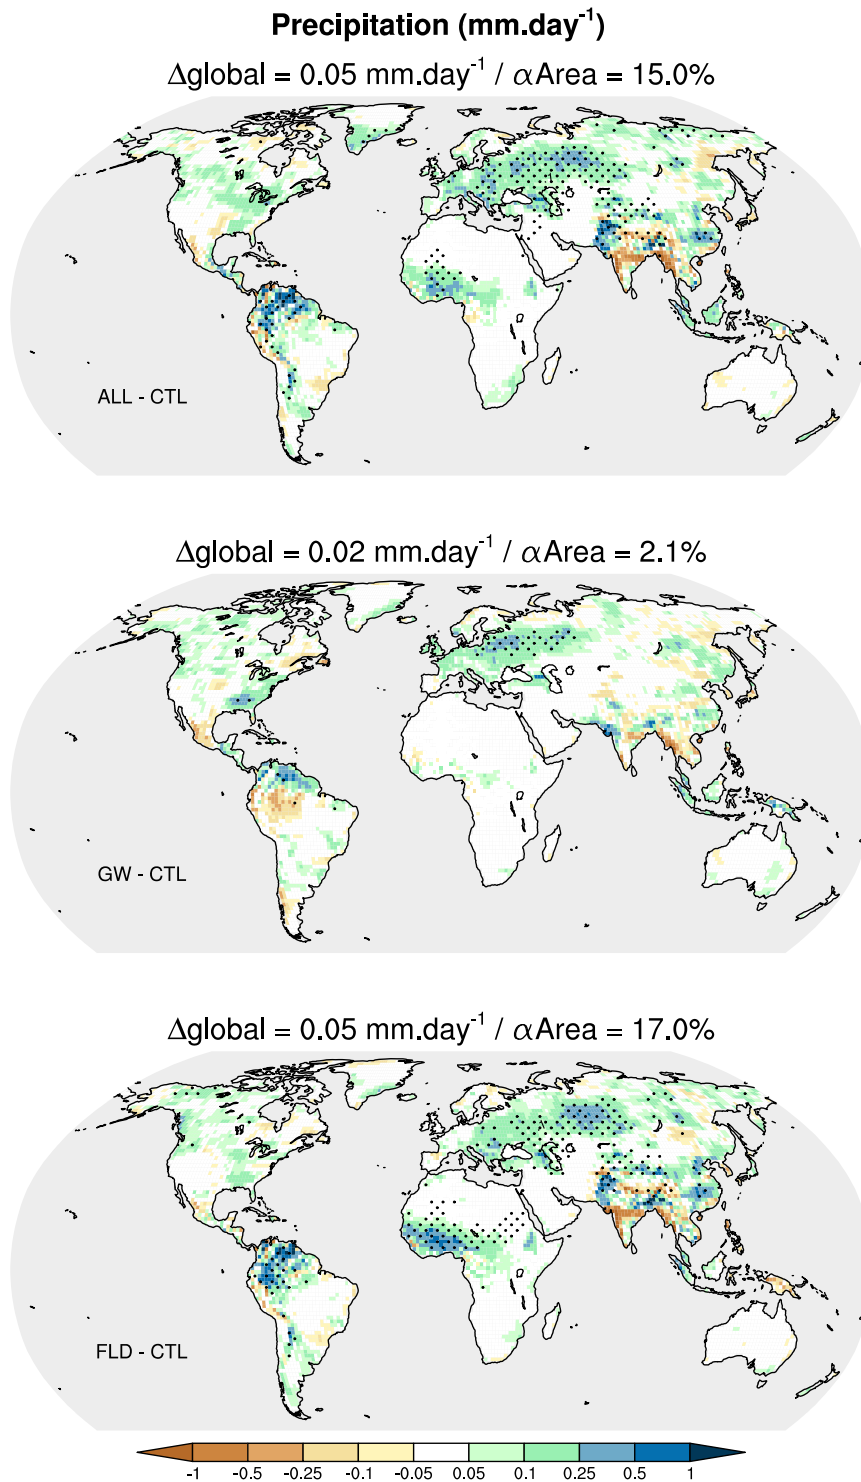

**Figure S3.** Impact of groundwater and floodplains on simulated extended boreal summer (June to September) precipitation over the 1980–2014 period, as in Figure 9a.

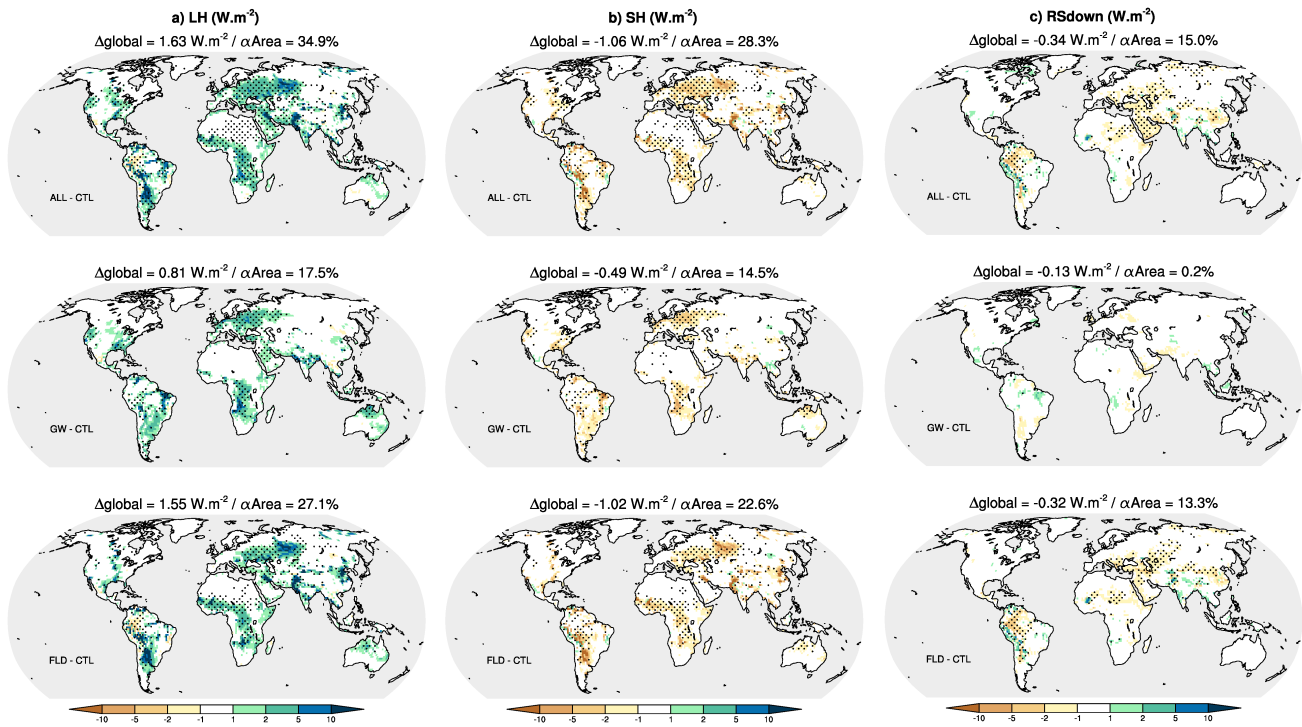

**Figure S4.** Impact of groundwater and floodplains on (a) surface latent heat flux (b) surface sensible heat flux and (c) downward surface solar radiation over the 1980–2014 period as in Figure 9b.

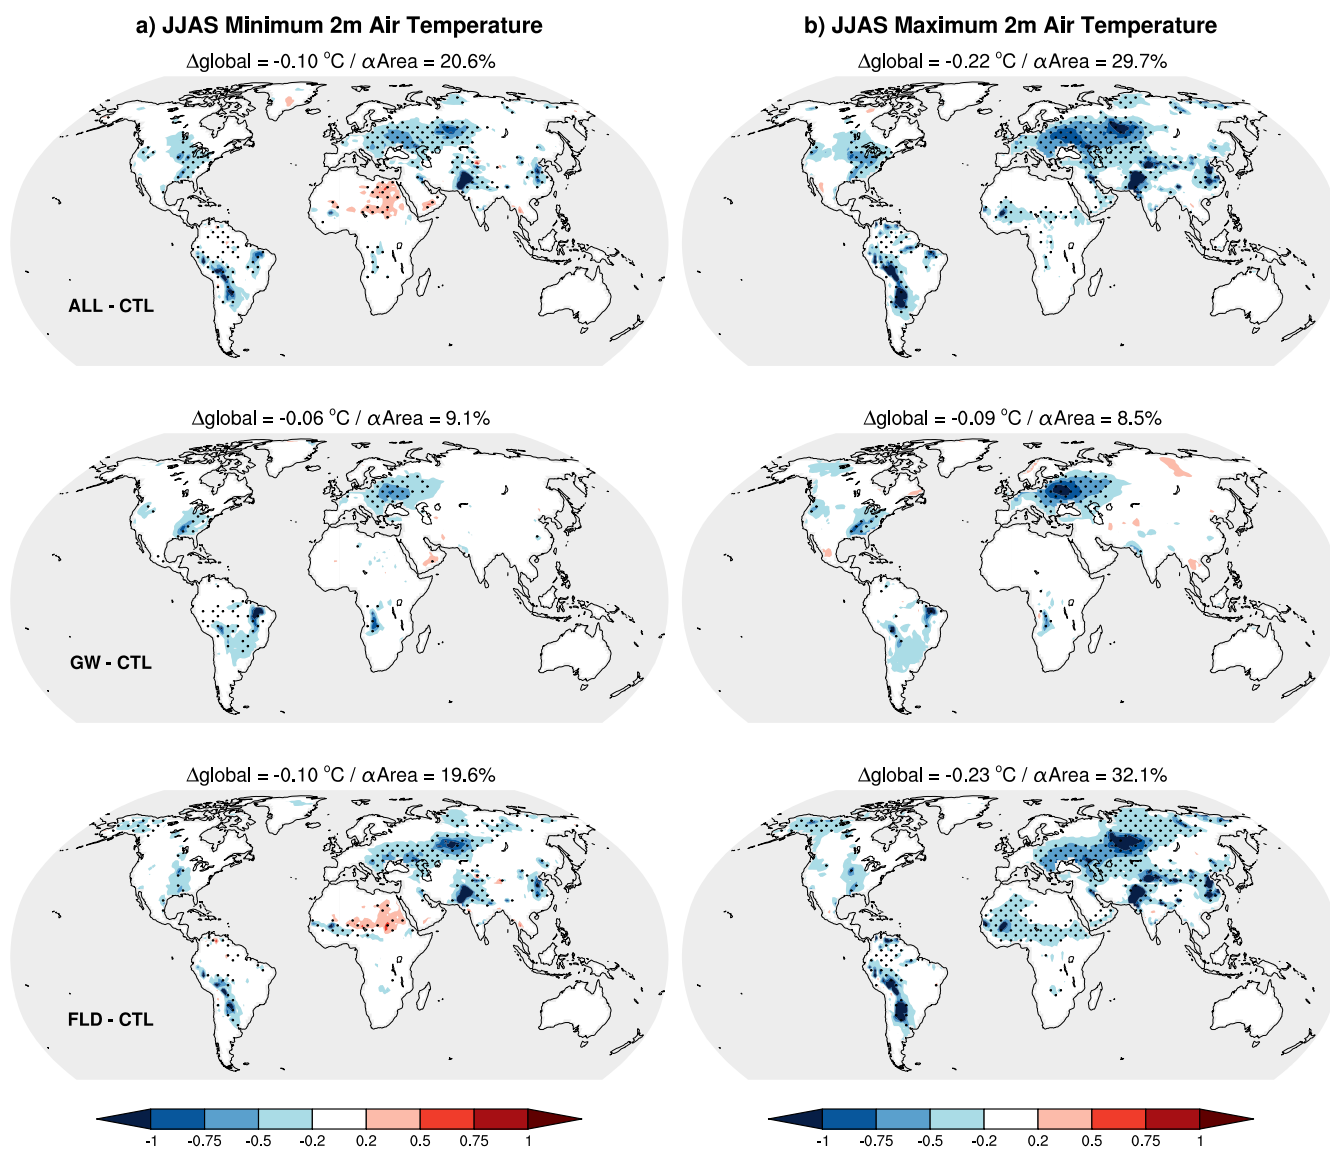

**Figure S5.** Impact of groundwater and floodplains on simulated extended boreal summer (a) daily-minimum and (b) daily-maximum mean monthly 2m air temperature over the 1980–2014 period as in Figure 9b.

### Sea level pressure (hPa)

$$\Delta_{\text{global}} = 0.11 \text{ hPa} / \alpha_{\text{Area}} = 16.7\%$$

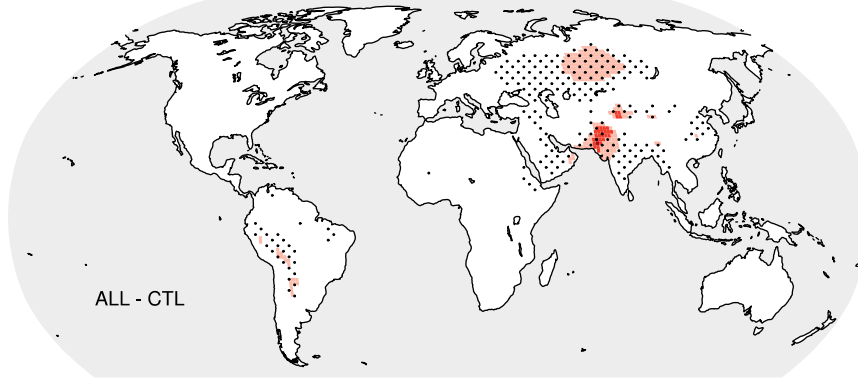

$$\Delta_{\text{global}} = 0.06 \text{ hPa} / \alpha_{\text{Area}} = 0.7\%$$

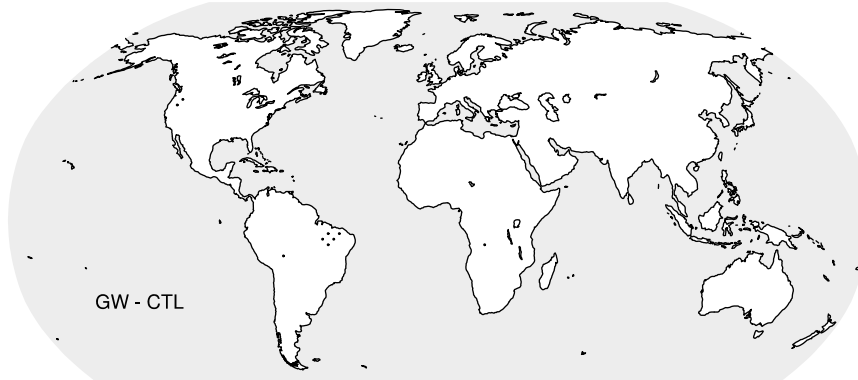

$$\Delta_{\text{global}} = 0.07 \text{ hPa} / \alpha_{\text{Area}} = 9.5\%$$

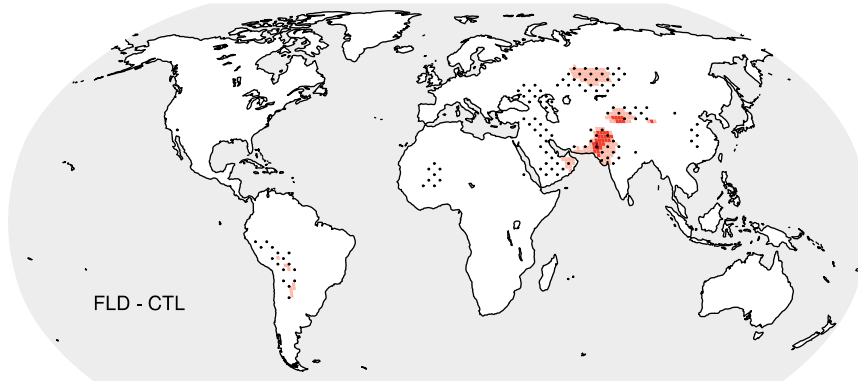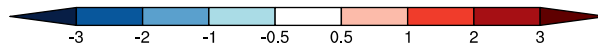

**Figure S6.** Impact of groundwater and floodplains on the boreal extended summer simulated sea level pressure over the 1980–2014 period, as in Figure 9a.

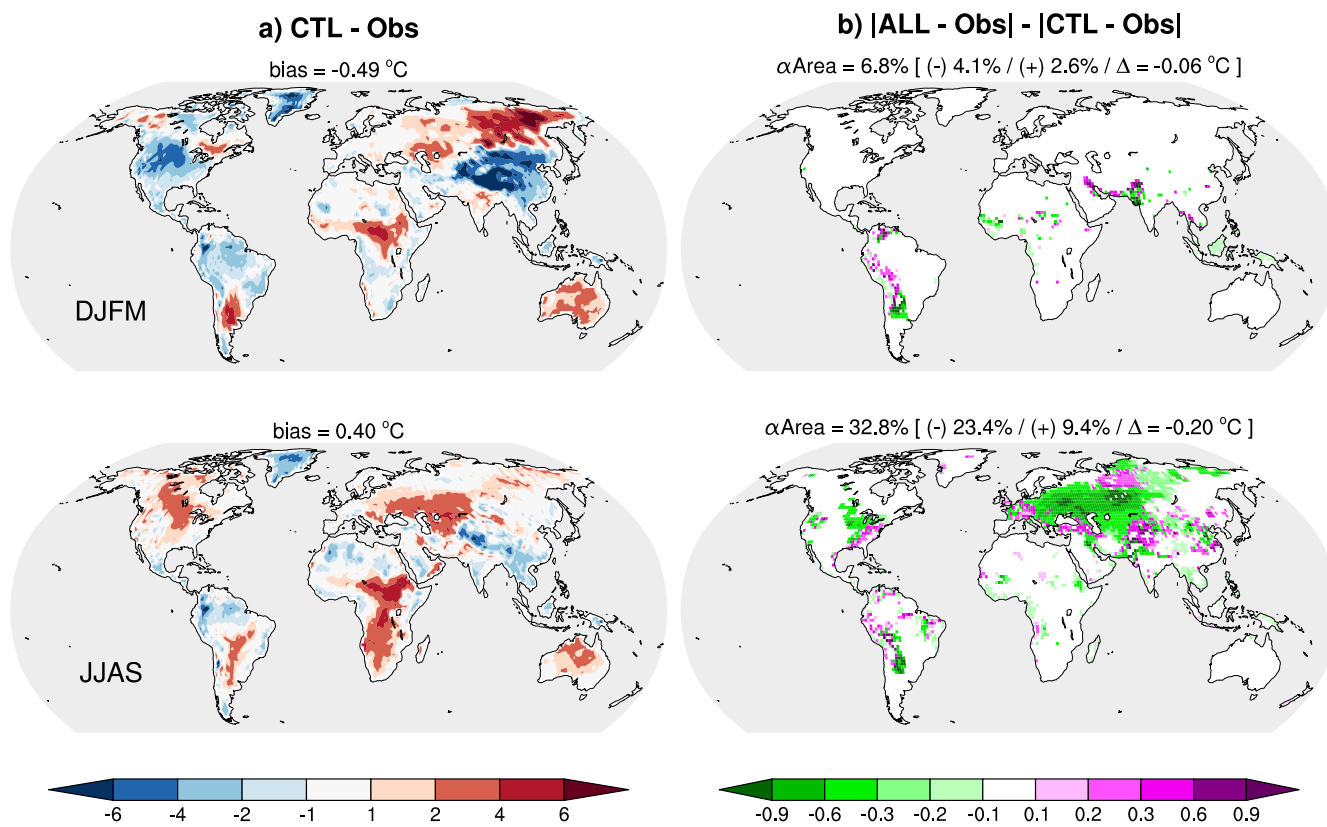

**Figure S7.** As in Figure S1 but for observed vs. simulated mean 2m air temperature according to Figure 10b.

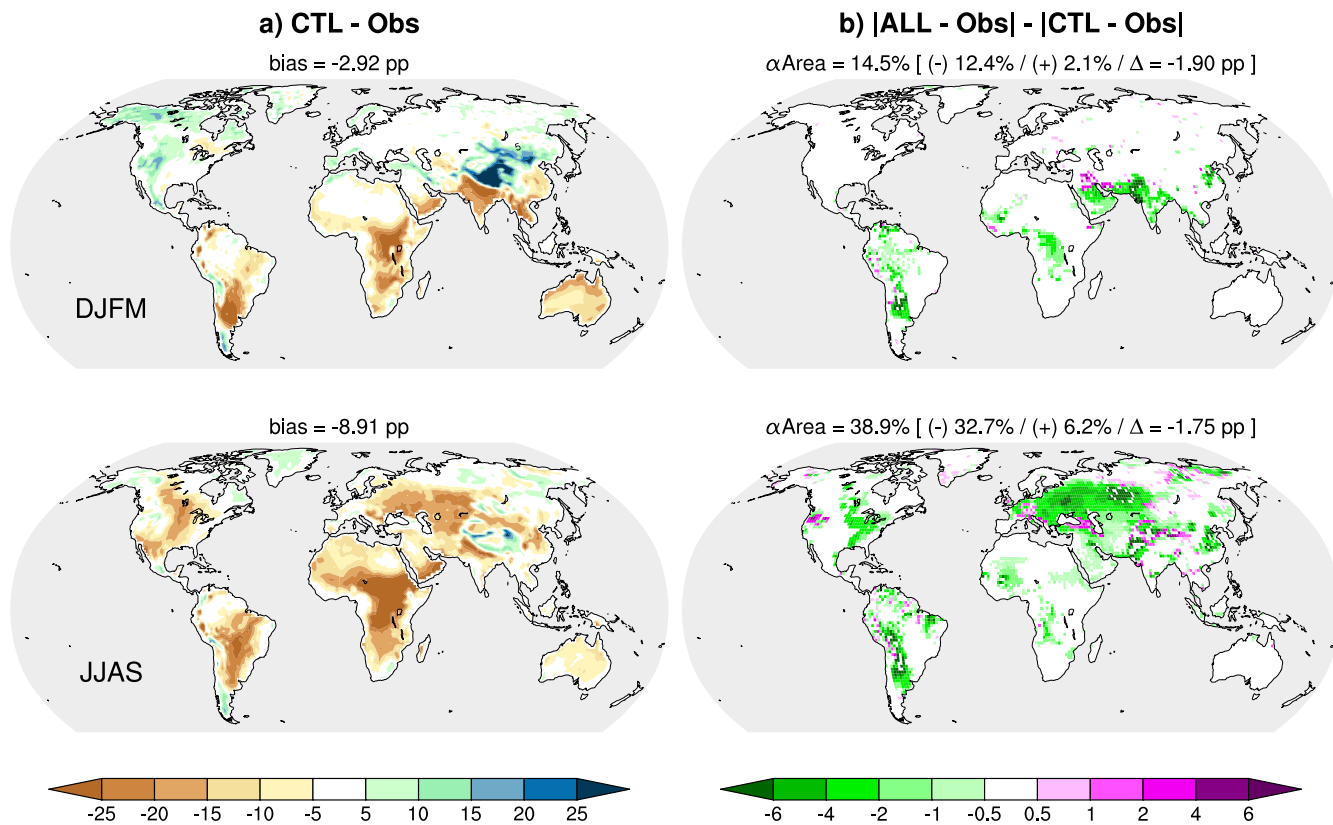

**Figure S8.** As in Figure S1 but for observed vs. simulated mean 2m air relative humidity according to Figure 10a.



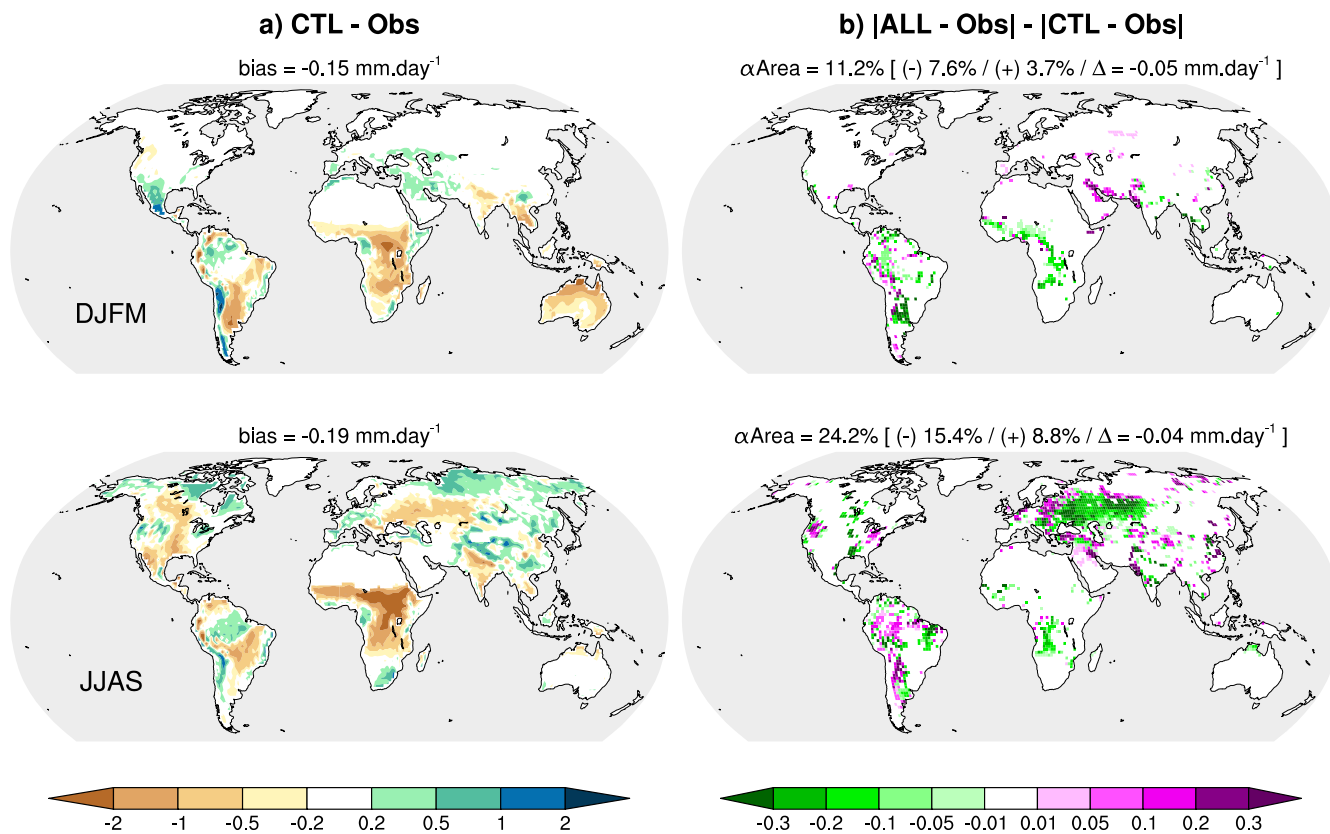

**Figure S9.** As in Figure S1 but for observed vs. simulated mean land surface evapotranspiration according to Figure 11b.
